# Supplementary material
Source: HighWire-hosted journal article supplement (https://bmjophth.bmj.com/content/9/1/e001453)
Supplement: inline-supplementary-material-1 [file inline-supplementary-material-1.pdf]

**Supplementary Figure 1:** Flow chart of the experimental protocol adopted in this study. Quality analysis at Days 0, 14 and 14<sup>PR</sup> (Post-Rinsing) consisted in specular microscopy analysis (ECD, HEX%, CV%), light microscopy analysis (ECD, endothelial mortality %), and corneal transparency measurement. Gentamicin sulphate carry over analysis was performed on UHPLC analysis on homogenised 8.25 mm corneal buttons. Created with BioRender.com.

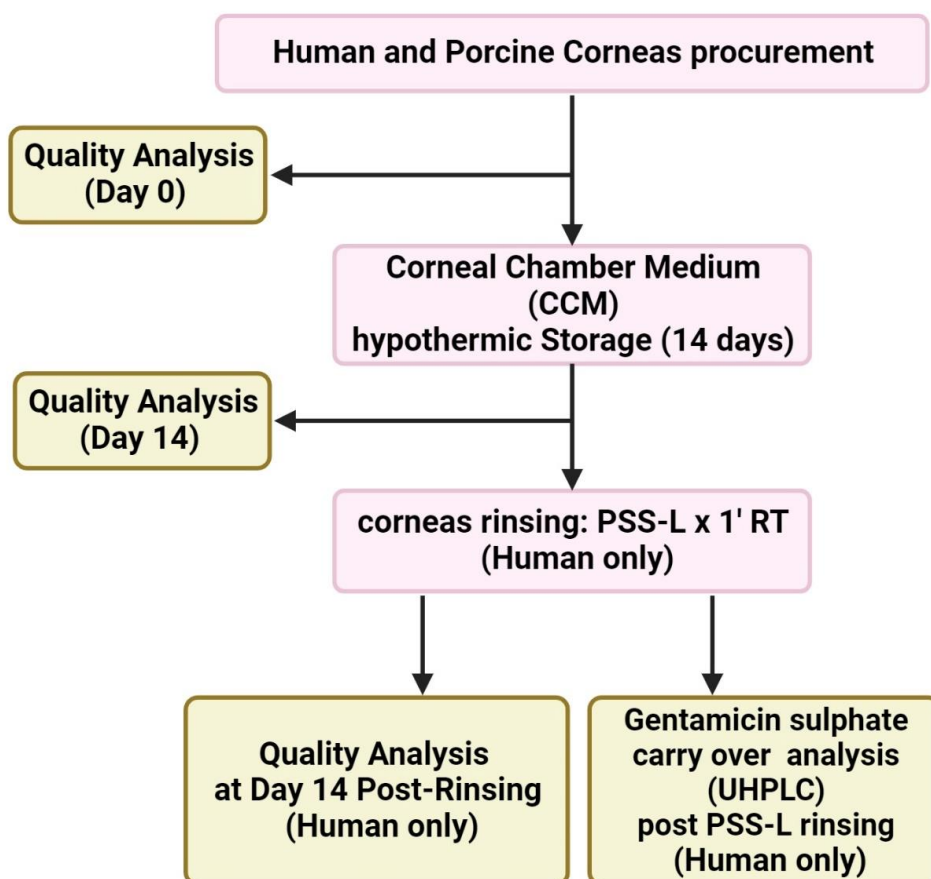

**Supplementary Table 1.** Grading system for Evaluation of the Reactivity Zone Before and After NRU Viability Assay (28).

| <b>Grade</b> | <b>Reactivity</b> | <b>Description of Reactivity Zone</b>              |
|--------------|-------------------|----------------------------------------------------|
| 0            | None              | No detectable zone around or under specimen        |
| 1            | Slight            | Some malformed or degenerated cells under specimen |
| 2            | Mild              | Zone limited to area under specimen                |
| 3            | Moderate          | Zone extending specimen size up to 1.0 cm          |
| 4            | Severe            | Zone extending farther than 1.0 cm beyond specimen |

**Supplementary Table 2:** Endothelial cell density (ECD, both light microscopy and specular microscopy), endothelial mortality, endothelial morphology score, HEX%, CV% and transparency of human corneas stored 14 days in Eusol-C 2-8°C (Day 14) and rinsed with PSS-L at the end of the storage (Day 14<sup>PR</sup>: post-rinsing). The number of samples are indicated in parenthesis. Values are expressed as mean data  $\pm$  SD. \* repeated measures ANOVA, followed by post hoc Bonferroni test; † Friedman test for multiple comparison of not-normally distributed data; § Friedman test, followed by post hoc Nemenyi test.

| Parameter                                                 | Time-point                       | Human corneas (n)   |
|-----------------------------------------------------------|----------------------------------|---------------------|
| <b>ECD Light Microscopy</b><br>(cell/mm <sup>2</sup> )    | Day 0                            | 2103 $\pm$ 360 (11) |
|                                                           | Day 14                           | 2085 $\pm$ 408 (11) |
|                                                           | Day 14 <sup>PR</sup>             | 2126 $\pm$ 356 (11) |
|                                                           | $p$ for multiple comparison *    | 0.9680              |
| <b>ECD Specular Microscopy</b><br>(cell/mm <sup>2</sup> ) | Day 0                            | 2218 $\pm$ 352 (7)  |
|                                                           | Day 14                           | 2263 $\pm$ 322 (7)  |
|                                                           | Day 14 <sup>PR</sup>             | 2253 $\pm$ 324 (7)  |
|                                                           | $p$ for multiple comparison *    | 0.9660              |
| <b>Mortality (%)</b>                                      | Day 0                            | 1.2 $\pm$ 1.2 (15)  |
|                                                           | Day 14                           | 3.1 $\pm$ 3.3 (15)  |
|                                                           | Day 14 <sup>PR</sup>             | 4.0 $\pm$ 3.6 (15)  |
|                                                           | $p$ for multiple comparison †    | 0.6703              |
| <b>HEX (%)</b>                                            | Day 0                            | 55.3 $\pm$ 2.6 (7)  |
|                                                           | Day 14                           | 51.9 $\pm$ 4.3 (7)  |
|                                                           | Day 14 <sup>PR</sup>             | 53.4 $\pm$ 4.5 (7)  |
|                                                           | $p$ for multiple comparison †    | 0.3813              |
| <b>CV (%)</b>                                             | Day 0                            | 38.9 $\pm$ 3.6 (7)  |
|                                                           | Day 14                           | 41.3 $\pm$ 3.1 (7)  |
|                                                           | Day 14 <sup>PR</sup>             | 39.1 $\pm$ 2.3 (7)  |
|                                                           | $p$ for multiple comparison †    | 0.3813              |
| <b>Transparency (%)</b>                                   | Day 0                            | 71.7 $\pm$ 3.2 (15) |
|                                                           | Day 14                           | 62.9 $\pm$ 4.1 (15) |
|                                                           | Day 14 <sup>PR</sup>             | 64.5 $\pm$ 4.2 (15) |
|                                                           | $p$ for multiple comparison †    | 0.0017              |
|                                                           | Day 0 vs Day 14 §                | < 0.0001            |
|                                                           | Day 0 vs Day 14 <sup>PR</sup> §  | 0.0055              |
|                                                           | Day 14 vs Day 14 <sup>PR</sup> § | 0.3102              |

**Supplementary Table 3.** *In vitro* cytotoxicity test by direct contact in BALB 3T3 cell line according to ISO 10993-5: effect on % viability of Corneal Chamber Medium (CCM) and PSS-L medical devices. The number of replicates is reported in parenthesis. \*According to the Supplementary Table 1, the achievement of a numerical grade greater than 2 is considered a cytotoxic effect; \*\*According to the ISO 10993-5, a sample is cytotoxic when the percentage of cell viability is lower than 70%.

|                                            | CCM                | PSS-L              |
|--------------------------------------------|--------------------|--------------------|
| BALB 3T3 cell viability (%), mean $\pm$ SD | 88.4 $\pm$ 0.4 (4) | 97.6 $\pm$ 2.0 (3) |
| Morphological grade*, median; IQR          | 0; 0 (4)           | 0; 0 (3)           |
| Cytotoxicity test result**                 | Not cytotoxic      | Not cytotoxic      |
